# Supplementary material for: Relevance of Molecular Groups in Children with Newly Diagnosed Atypical Teratoid Rhabdoid Tumor: Results from Prospective St. Jude Multi-institutional Trials
Source: Oxford University Press journal article supplement (doi:10.1158/1078-0432.ccr-20-4731), 2021-03-18
Supplement: 10780432ccr204731-sup-256676_0_supp_6768027_qkwckt.docx [file 10780432ccr204731-sup-256676_0_supp_6768027_qkwckt.docx]

**Whole-exome sequencing and germline variant analyses**

Germline DNA exomes were captured by using the TruSeq DNA exome kit (Illumina, CA, USA). Paired-end sequencing reads were mapped to the human reference genome (GRCh38) with Parabricks software, a graphics processing unit—accelerated bwa-like mapping application. Germline single-nucleotide variations/indels were identified by following the GATK best practice for quality score calibration and indel realignment.1,2 Detected variants were annotated by using ANNOVAR.3 Mutations in *SMARCB1* were visually reviewed with IGV to ensure good support with read count and read quality. Germline copy number variants (CNVs) were detected by CNVkit and cn.MOPS.4,5 Detected CNVs were intersected with protein coding gene annotation using bedtools and visually inspected for coverage and supporting reads to ensure good quality.6

**References**

1. McKenna A, Hanna M, Banks E, et al. The Genome Analysis Toolkit: a MapReduce framework for analyzing next-generation DNA sequencing data. *Genome Research.* 2010;20(9):1297-1303.

2. DePristo MA, Banks E, Poplin R, et al. A framework for variation discovery and genotyping using next-generation DNA sequencing data. *Nat Genet.* 2011;43(5):491-498.

3. Wang K, Li M, Hakonarson H. ANNOVAR: functional annotation of genetic variants from high-throughput sequencing data. *Nucleic Acids Res.* 2010;38(16):e164.

4. Talevich E, Shain AH, Botton T, Bastian BC. CNVkit: genome-wide copy number detection and visualization from targeted dna sequencing. *PLoS Comput Biol.* 2016;12(4):e1004873.

5. Klambauer G, Schwarzbauer K, Mayr A, et al. cn.MOPS: mixture of Poissons for discovering copy number variations in next-generation sequencing data with a low false discovery rate. *Nucleic Acids Res.* 2012;40(9):e69.

6. Quinlan AR, Hall IM. BEDTools: A flexible suite of utilities for comparing genomic features. *Bioinformatics.* 2010;26(6):841-842.
